# Supplementary material
Source: PubMed Central journal article supplement (PMC5198487)
Supplement: JB.00696-16_zjb999094297s1.pdf [file JB.00696-16_zjb999094297s1.pdf]

## SUPPLEMENTAL METHODS

**Generation of *Mtb* DosR KO strains.** A 2,442bp PCR fragment containing *dosR* plus 963bp upstream and 823bp downstream was generated using primers dosR-1 and dosS-1 and cloned into the *XbaI* site of plasmid pcDNA2.1 (Invitrogen). The resulting plasmid was digested with *BbsI* and *BlpI* to replace a 477bp fragment from the *dosR* gene with the 1.6kb Hygromycin resistance cassette obtained from pHint (Garbe *et al.*, 1994). Finally, the 3,512bp *XbaI* insert of this plasmid was cloned into the same site of vector pPR23-1 (Pelicic *et al.*, 1997) generating the plasmid pPDM15 that was used for transforming *Mtb* in order to generate the *dosR* KO mutants using previously described procedures (Pelicic *et al.*, 1997). Confirmation of the *dosR* KO strains was done by PCR using primers Hyg3'-Fd + dosS-D (1,110bp), Hyg5'-rev + Rv3134-A (1,041bp) and devR-antiRev + dosR-A-rev-GK (426bp fragment absent in the KO mutant). Additionally, phenotypic confirmation was performed by quantitative real-time PCR (qRT-PCR) using primers DosR-RT-6-f and DosR-RT-6-r.

**Generation of *Mtb* DosT KO strains.** A 4.4kb *BamHI* fragment containing *dosT* was isolated from BAC Rv175 (kindly provided by Dr. Roland Brosch, Institut Pasteur) and ligated with *BamHI* restricted pBluescript II KS+ (Stratagene) that had previously had its *EcoRI* site removed from the polylinker. The resulting construct was digested with *EcoRI* to remove a 1,374bp fragment internal to *dosT*, filled-in with Platinum *Pfx* polymerase (Invitrogen) and then blunt-end ligated with the 1.6kb Hygromycin resistance cassette. This plasmid was subsequently digested with *MluI* and *ScaI*, with the resulting ends of the insert fragment made blunt via treatment with Platinum *Pfx* (Invitrogen). The purified insert was then ligated with pPR23-1 (Pelicic *et al.*, 1997) that had previously been digested with *NotI* and *XbaI*, and filled-in with Platinum *Pfx*. The resulting plasmid is referred to as pPR23 $\Delta$ dosT/Hyg and was used to transform H37Rv (ATCC 27294). All transformation and selection procedures were performed as previously described (Pelicic *et al.*, 1997; Snapper *et al.*, 1990). Confirmation of the *dosT* KO strains was by PCR using primers Hyg3'-Fd + dosTKO-2R (1,090bp), Hyg5'-rev + dosTKO-1F (1,032bp). Additionally, phenotypic confirmation was performed by qRT-PCR using primers dosTSYBR-R2 and dosTSYBR-F2.

**Generation of *Mtb* DosS KO strains.** Primers VVdosR-E and Rv3131-D were used to amplify a 2,830bp fragment containing *dosS* from H37Rv genomic DNA. The purified PCR product was restricted with *XbaI* and ligated into the *XbaI* site of pcDNA2.1 (Invitrogen) prior to sequencing. The

965bp *AvrII-Kpn2I* fragment contained within the cloned insert was removed and subsequently replaced with a 1.2kb Kanamycin resistance cassette isolated from pMV306 (Stover *et al.*, 1991) following digestion with *NheI* and *SpeI*. All 4 restriction sites were filled-in prior to blunt-end ligation. Finally, the resulting pVV2 plasmid was then digested with *XbaI* and the purified insert filled-in and blunt-end ligated with pPR23-1 (*NotI* digested, filled-in) to generate p $\Delta$ dosSv2.0. Genetic confirmation of *Mtb dosS* KO strains was done by PCR using primers Kan3'-Fd + devR-antiRev (1,197bp) and Kan5'-Rev + 3131-F2 (1,459bp). Additionally, phenotypic confirmation was performed by qRT-PCR using primers DosS-F2 and DosS-R2.

**Generation of *Mtb* DosR-DosS KO strains.** Plasmid pBS#2 (4,044bp *Sall-SacI* fragment containing Rv3134c/*dosR/dosS* from H37Rv genomic DNA cloned into pBluescript II KS+) was digested with *BbsI* and *Kpn2I* to remove 1,956bp of the *dosR* and *dosS* coding sequence, filled-in with T4 DNA polymerase to generate blunt-ends, dephosphorylated, and then ligated with the Kanamycin resistance cassette as above. The resulting pBS/*dosR+S*\_KO plasmid was digested with *HindIII* and *SacI* to release the entire insert, which was then filled-in and blunt-end ligated with pPR23-1 (as above) to generate pPR23 $\Delta$ dosR+S. Genetic confirmation of *dosRdosS* KO strains was done by PCR using primers Kan3'-Fd + dosRa-F (1,603bp), Kan5'-Rev + 3131-F2 (1,028bp) and devR-antiRev + dosS-R1-AF (1,070bp fragment absent in the KO mutant). Phenotypic confirmation was by qRT-PCR using primers DosS-F2 and DosS-R2 and DosR-RT-6-f and DosR-RT-6-r.

**Generation of *Mtb* DosS-DosT KO strains.** Once the DosT KO strain (Hyg<sup>R</sup>) was generated in H37Rv and confirmed as above, it was transformed with the p $\Delta$ dosSv2.0 plasmid in order to disrupt *dosS* via insertion of the Kan<sup>R</sup> cassette (see above).

**Generation of *Mtb* DosR-DosS-DosT KO strains.** Once the DosT KO strains (Hyg<sup>R</sup>) were generated and confirmed as above, they were subsequently transformed with the pPR23 $\Delta$ dosR+S plasmid in order to disrupt both *dosR* and *dosS* via insertion of the Kan<sup>R</sup> cassette (see above).

**Generation of *Mtb* Tgs1 KO strains.** A 2,114bp PCR fragment containing the *tgs1* gene plus 736 bp upstream was generated using primers Rv3130-1 and Rv3131-1 and cloned into the *NotI* site of plasmid pcDNA2.1 (Invitrogen). The resulting plasmid was digested with *NheI* and *PshAI* for replacing a 116bp fragment from the *tgs1* gene with the 1.6kb Hygromycin cassette. Finally, the 3,506bp *NotI* insert of this plasmid was cloned into the same site of vector pPR23-1 (Pelicic *et al.*,

1997) generating plasmid pPDM4 that was used for transforming *Mtb* in order to generate the *tgsI* KO mutants using previously described procedures (Pelicic *et al.*, 1997). Genetic confirmation of the *tgsI* KO strains was by PCR using primers Hyg3'-Fd + 3130cH3R (1,160bp), Hyg5'-rev + Rv3131-C (1,158bp). Additionally, phenotypic confirmation was performed by qRT-PCR using primers Rv3130c-F-Syb and Rv3130c-R-SyB.

**Generation of complemented strains.** Complementation of the KO strains generated above was accomplished by electroporation (Snapper *et al.*, 1990) with the following plasmids:

pNS3 and pDC4: A 3,359bp fragment containing truncated Rv3134c (from nucleotide 305) and the complete *dosR* and *dosS* genes was cloned into the *HpaI* site of pMV306-Kan. pNS3 contains the 507C and 601C allele from H37Rv, and pDC4 contains the 507G and 601T *dosR* promoter allele from HN878.

pNS5 and pDC5: A 1,883bp fragment containing 392 bp upstream of the Rv3134c gene as well as the complete Rv3134c and *dosR* genes was cloned into the *HpaI* site of pMV306-Kan. pNS5 contains the 507C and 601C allele from H37Rv, and pDC5 contains the 507G and 601T allele from HN878.

pNS6 and pDC6: A 4,049bp fragment containing 392bp upstream of the Rv3134c gene and the complete Rv3134c, *dosR* and *dosS* genes was cloned into the *HpaI* site of pMV306-Kan. pNS6 contains the 507C and 601C allele from H37Rv, and pDC6 contains the 507G and 601T allele from HN878. For generating pNS6-GM and pDC6-GM, the 1.2kb *NheI-SpeI* fragment (Kanamycin resistance cassette) from pNS6 or pDC6 was replaced with a 1.4kb *HindIII-SpeI* fragment from pPR23 containing the Gentamicin resistance cassette (GM).

pAA3: A 4,049bp fragment containing 392bp upstream of the Rv3134c gene and the complete Rv3134c, *dosR* and *dosS* genes was cloned into the *HpaI* site of pMV306-Kan. The *dosR* promoter region contains the 507C H37Rv and 601T HN878 hybrid allele.

pAA6: A 4,049bp fragment containing 392bp upstream the Rv3134c gene and the complete Rv3134c, *dosR* and *dosS* genes was cloned into the *HpaI* site of pMV306-Kan. It contains the 507G and 601T allele from HN878. It also harbors a transversion of T to A at position 3486 (position 161 of the *dosR* gene) for replacing asp54 with glu54.

pAR2: A 3,393bp fragment containing 392bp upstream of the Rv3134c gene and the complete Rv3134c and *dosS* genes (no *dosR*) was cloned into the *HpaI* site of pMV306-Kan. It contains the 507G and 601T allele from HN878.

pdosT-wt and pdosT-mut: A 1,722bp fragment containing *dosT* was cloned into the *BalI-HindIII* sites of pMV361-GM. pdosT-wt contains the wild type *dosT* gene of H37Rv and pdosT-mut corresponds to *dosT* from HN878 which contains a frame-shift mutation at position G775.

pN-FLAGdosT-WT and pN-FLAGdosT-MUT: A 1,742bp fragment containing *dosT* was cloned into pMV361-Kan. It also harbors the Flag-epitope sequence (5'-GACTACAAGGACGACGAT GACAAG-3') inserted at the 5' end of *dosT* for generating a N-terminal Flag-DosT fusion. Expression is driven by the *hsp60* promoter. pN-FLAGdosT-WT contains the wild-type *dosT* allele from H37Rv and pN-FLAGdosT-MUT corresponds to the gene from HN878 with a frame-shift mutation at position G775.

pC-FLAGdosT-WT and pC-FLAGdosT-MUT: A 1,742bp fragment containing *dosT* was cloned into pMV361-Kan. It also harbors a Flag-epitope sequence (5'-GACTACAAGGACGACGAT GACAAG-3') located at the 3' end of *dosT* for generating a C-terminal DosT-Flag fusion. Expression is driven by the *hsp60* promoter. pC-FLAGdosT-WT contains the wild-type *dosT* allele from H37Rv and pC-FLAGdosT-MUT corresponds to the gene from HN878 with a frame-shift mutation at position G775.

Genetic complementation of the wild-type or KO strains was initially confirmed by standard PCR using the appropriate primers: Genta-Fd + Genta-rev (377bp), Hyg-Fd + Hyg-R (389bp) or KanF + KanR (480bp). Further confirmation was through qRT-PCR as described in the main body of the text.

## REFERENCES

- Garbe, T.R., Barathi, J., Barnini, S., Zhang, Y., Abou-Zeid, C., Tang, D., *et al.* (1994). Transformation of mycobacterial species using hygromycin resistance as selectable marker. *Microbiology* **140**, 133-138.
- Pellicic, V., Jackson, M., Reyrat, J.M., Jacobs, W.R., Jr., Gicquel, B., and Guilhot, C. (1997). Efficient allelic exchange and transposon mutagenesis in *Mycobacterium tuberculosis*. *Proc Natl Acad Sci USA* **94**, 10955-10960.
- Snapper, S.B., Melton, R.E., Mustafa, S., Kieser, T., and Jacobs, W.R., Jr. (1990). Isolation and characterization of efficient plasmid transformation mutants of *Mycobacterium smegmatis*. *Mol Microbiol* **4**, 1911-1919.
- Stover, C.K., de la Cruz, V.F., Fuerst, T.R., Burlein, J.E., Benson, L.A., Bennett, L.T., Bansal, G.P., Young, J.F., Lee, M.H., Hatfull, G.F., *et al.* (1991). New use of BCG for recombinant vaccines. *Nature* **351**, 456-460.

**TABLE S1: Primers used in this study**

| <b>Name</b>   | <b>Sequence</b>                              | <b>R.E. site</b> |
|---------------|----------------------------------------------|------------------|
| 3130cH3R      | 5'-CGCCCAGTTACTACCGTGG-3'                    |                  |
| 3131-F2       | 5'-ATGCTGCGGCAGGTCAGTG-3'                    |                  |
| devR-antiRev  | 5'-TCGAATTCGTGGTAAAGGTCTTCTTGGTCG-3'         | <i>EcoRI</i>     |
| dosR-1        | 5'-TGCTCTAGATTGCGTCTGTCATCGGTCGAT-3'         | <i>XbaI</i>      |
| dosRa-F       | 5'-CCTAACGTCGATTGCGCAC-3'                    |                  |
| dosR-A-rev-GK | 5'-TCTCGGCGGCACCGCGCA-3'                     |                  |
| DosR-RT-6-f   | 5'-CTGCGCTGTCTGATCCTCAC-3'                   |                  |
| DosR-RT-6-r   | 5'-CAGCGCCCACATCTTTGAC-3'                    |                  |
| dosS-1        | 5'-TGCTCTAGAACTGTTTCAATCACCAGCAGCT-3'        | <i>XbaI</i>      |
| dosS-C        | 5'-GGCATTGCGGACTGCGATAC-3'                   |                  |
| dosS-D        | 5'-AACAAATGGAAGCCAQCAGCGCT-3'                |                  |
| dosS-F1-AF    | 5'-CGGGCTGCTCATCGAAGA-3'                     |                  |
| DosS-F2       | 5'-TCGCCCGTGACCTCCAT-3'                      |                  |
| DosS-R2       | 5'-CTGCAAAGCCAGGCCAAT-3'                     |                  |
| dosTKO-1F     | 5'-GAGAACGCGGTGCGCTAC-3'                     |                  |
| dosTKO-2R     | 5'-GTTCCAGTACTAGCTGGGAC-3'                   |                  |
| dosTSYBR-F2   | 5'-CCGATGCGGACCTTCCT-3'                      |                  |
| dosTSYBR-R2   | 5'-GGTCAAGTAAAGATTGCCGAACA-3'                |                  |
| Genta-Fd      | 5'-ATCGTCACCGTAATCTGCTTGC-3'                 |                  |
| Genta-rev     | 5'-ATCATTCGCACATGTAGGCTCG-3'                 |                  |
| Hyg-Fd        | 5'-CATTCCGAGGTCTTCCCGGA-3'                   |                  |
| Hyg-R         | 5'-TGCAGGAAGGTGAAGGCGAG-3'                   |                  |
| Hyg3'-Fd      | 5'-GGAAGTGGCGCAGTTCCTCT-3'                   |                  |
| Hyg5'-rev     | 5'-TGTGGACCTCGACGACCTG-3'                    |                  |
| KanF          | 5'-ATGAGCCATATTCAACGGGAAA-3'                 |                  |
| KanR          | 5'-CAAACCGTTATTCATTCGTGAT-3'                 |                  |
| Kan3'-Fd      | 5'-AGGATCAGATCACGCATCTTC-3'                  |                  |
| Kan5'-rev     | 5'-TCTTGTGCAATGTAACATCAGAG-3'                |                  |
| Rv3130-1      | 5'-AAGGAAAAAAGCGGCCGCCCGCTTACTGATCGCCACCA-3' | <i>NotI</i>      |
| Rv3130c-F-SyB | 5'-GCGGCGACTCACCTGCTA-3'                     |                  |
| Rv3130c-R-SyB | 5'-GCGAAGCTGTGCTCATACTT-3'                   |                  |

| Name        | Sequence                                                      | R.E. site   |
|-------------|---------------------------------------------------------------|-------------|
| Rv3131-1    | 5'-AAGGAAAAAAG <b><u>CGGCCG</u></b> CTGAGCTCGCGCAGATATTCCT-3' | <i>NotI</i> |
| Rv3131-C    | 5' TCTGAT <b><u>GCCGGC</u></b> TCGTTGCG-3'                    | <i>NaeI</i> |
| Rv3131-D    | 5'-TGCT <b><u>TCTAGAT</u></b> TGGCGCAGGCTGTCTTGGAC-3'         | <i>XbaI</i> |
| Rv3134-A    | 5'-GATAGGTGAGATTCATTCTCGC-3'                                  |             |
| Rv3134c-M-F | 5'-GGTCAAGATCGAAACGGAGG-3'                                    |             |
| sigA1-F     | 5'-TCGCGCCTACCTCAAACAG-3'                                     |             |
| sigA1-R     | 5'-CGTACAGGCCAGCCTCGAT-3'                                     |             |
| VVdosR-E    | 5'-TGCT <b><u>TCTAGA</u></b> ACGAGGTGGTGCGTGGT-3'             | <i>XbaI</i> |

Bold underlined sequences correspond to restriction enzyme sites.

Fig. S1

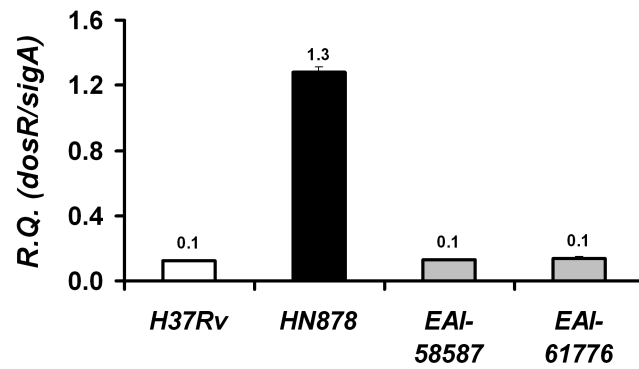

**Figure S1.** *Mtb* strains with only the C507G SNP display a level of *dosR* expression that is equivalent to H37Rv. qRT-PCR of *dosR* expression analyzed in H37Rv (Euro-American or Lineage 4), HN878 (Beijing lineage), and 2 independent isolates of the East-African/Indian lineage (or Lineage 3). Results are shown as relative quantities (R.Q.) using *sigA* as the normalizing gene. The error bars represent standard deviation as indicated in the Materials and Methods.



Fig. S2

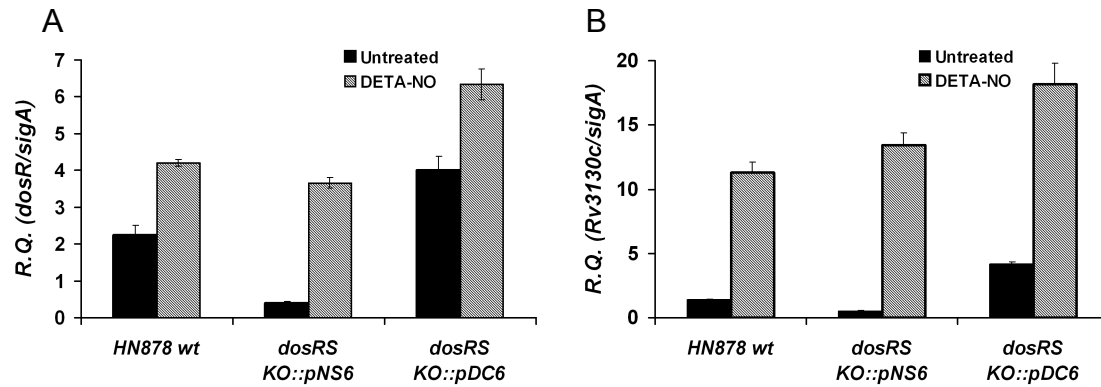

**Figure S2.** Complementation of the HN878 *dosRS* KO restores DosR regulon expression.

**A** and **B.** Prior to carrying out the mouse experiments indicated in Fig. 5, qRT-PCR of *dosR* (**A**) and *Rv3130c* (**B**) expression was compared between HN878 wild-type, HN878 *dosRS* KO, and the latter complemented with either pNS6 or pDC6 (see Fig. 2 for a complete description). Results are presented as relative quantities (R.Q.) using *sigA* as the normalizing gene. Standard deviations are shown.

Fig. S3

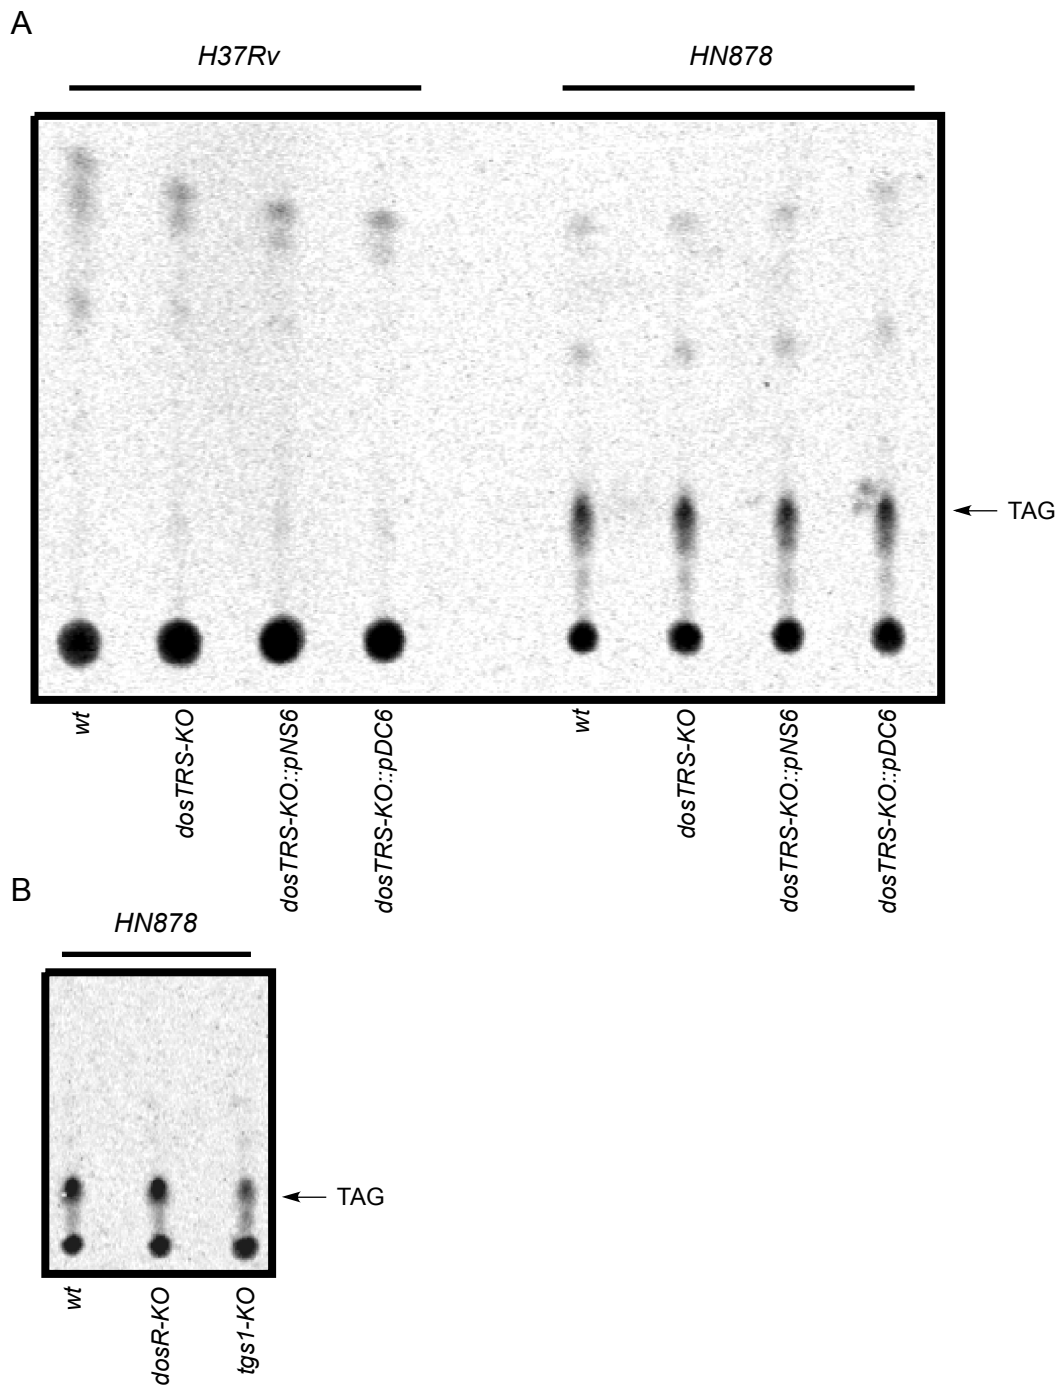

**Figure S3.** Constitutive *dosR* overexpression is not the underlying cause of the TAG accumulation seen in Beijing strains.

**A.** Thin Layer Chromatography (TLC) of [ $^{14}\text{C}$ (U)] glycerol labeled apolar lipids extracted from wild-type, *dosTRS* triple KO, and pNS6 and pDC6 complemented strains of the latter (see Fig. 2 for a complete description) prepared in both Beijing and non-Beijing (*H37Rv*) backgrounds. Samples were run three times in hexanes/ethyl acetate (98:2, v/v). The position of the triacylglycerides is shown by an arrow.

**B.** TLC of [ $^{14}\text{C}$ (U)] glycerol labeled apolar lipids prepared from wild-type *HN878*, *HN878 dosR* KO and *HN878 tgs1* KO strains is shown. Plates were run three times in hexanes/ethyl acetate (98:2, v/v). The arrow indicates the relative position of the labeled triacylglycerides.
